# Supplementary material
Source: PubMed Central journal article supplement (PMC4215337)
Supplement: Supp_Fig2.pdf [file Supp_Fig2.pdf]

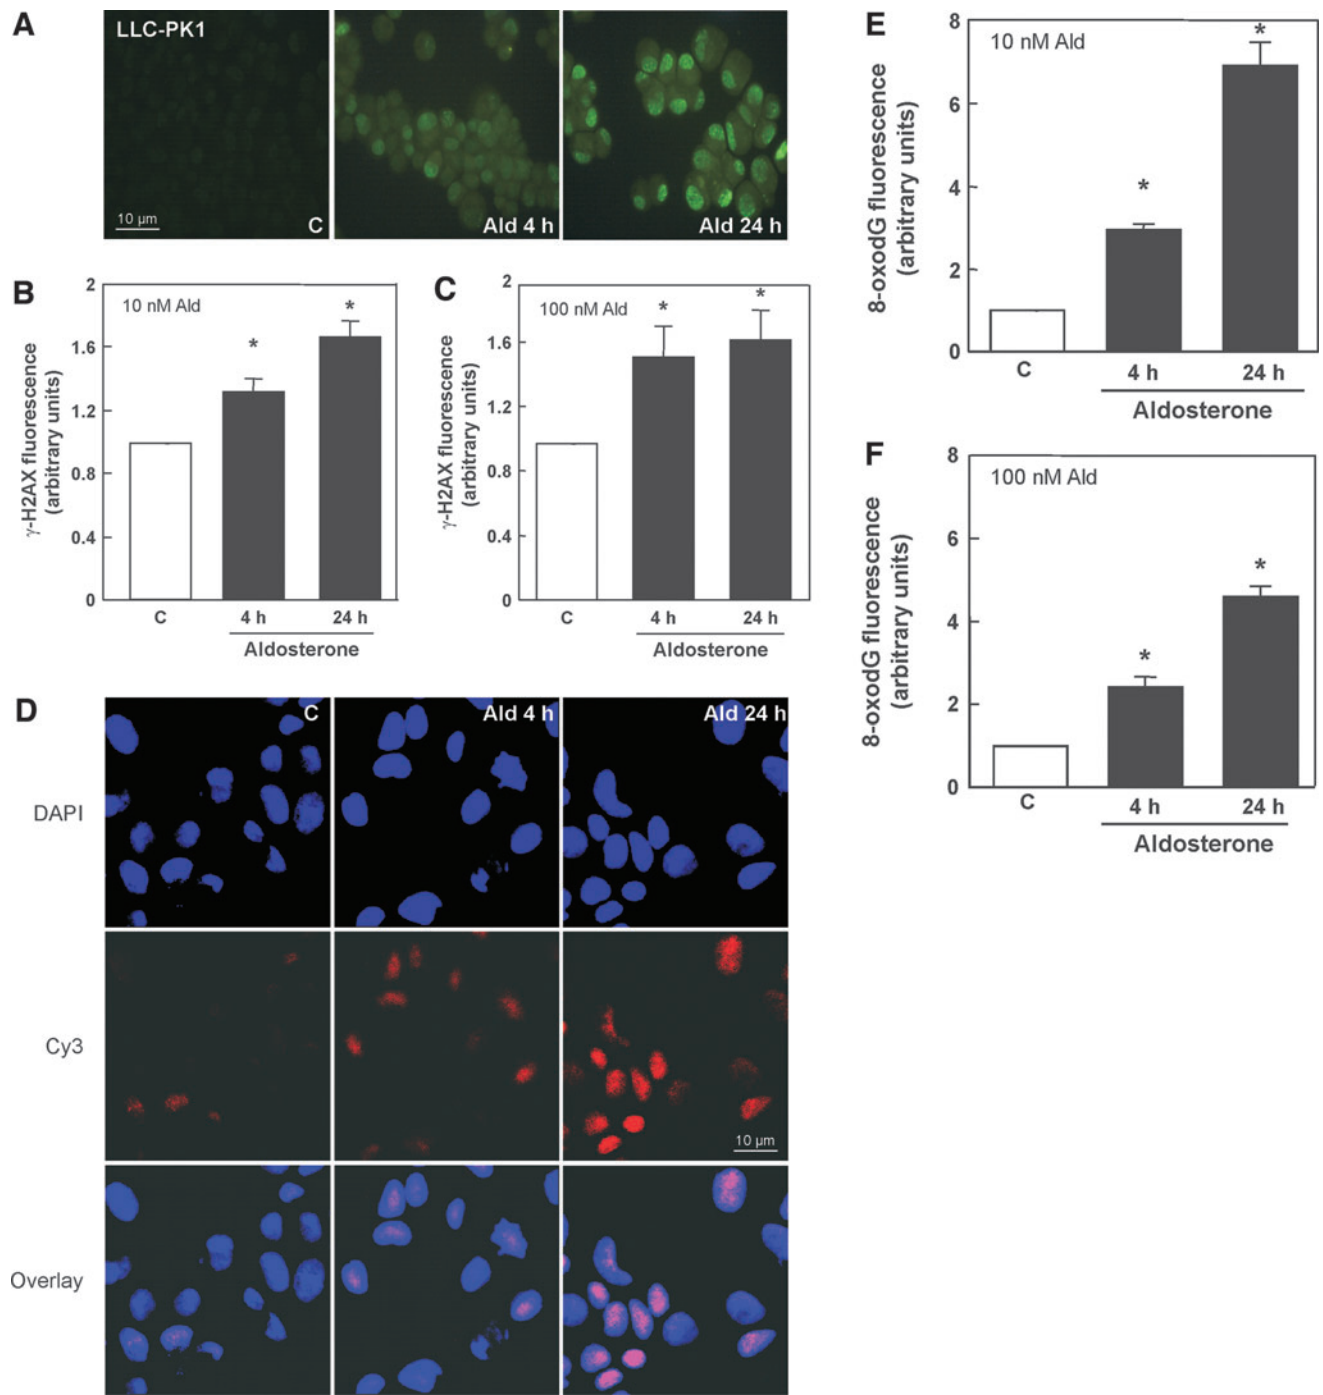

**SUPPLEMENTARY FIG. S2. Aldosterone affects oxidative DNA damage levels in LLC-PK1 cells.** (A) Cells were stained for DSBs with an antibody against  $\gamma$ -H2AX. Shown are representative pictures of control cells and cells treated with 100 nM aldosterone after the indicated time points. Pictures were taken using a fluorescence microscope. Quantifications were done by measuring gray values of  $\sim$ 150 cells treated with either 10 nM (B) or 100 nM (C) aldosterone for the indicated time spans with ImageJ. (D) LLC-PK1 cells stained for 8-oxodG lesions. Shown are representative pictures of control cells and cells treated with 10 nM aldosterone at the indicated time points (*upper panels*: nuclear dye DAPI (blue), *middle panels*: Cy3 fluorescence representing positive 8-oxodG lesions (red), and *bottom panels*: overlay of Cy3 fluorescence (red) and nuclear dye DAPI (blue)). Pictures were taken by a TCS SP5 laser scanning confocal microscope. Quantifications were done by measuring gray values of  $\sim$ 100 cells that were treated with either 10 nM (E) or 100 nM (F) aldosterone for the indicated time spans with ImageJ. (B, C, E, F) Shown is the median  $\pm$  the standard error of the median,  $*p \leq 0.05$  versus the control group, evaluated by Mann-Whitney test. DAPI, 4',6-diamidin-2-phenylindol; DSBs, double-strand breaks; 8-oxodG, 7,8-dihydro-8-oxo-guanine.
