# Supplementary material
Source: PubMed Central journal article supplement (PMC4215337)
Supplement: Supp_Fig3.pdf [file Supp_Fig3.pdf]

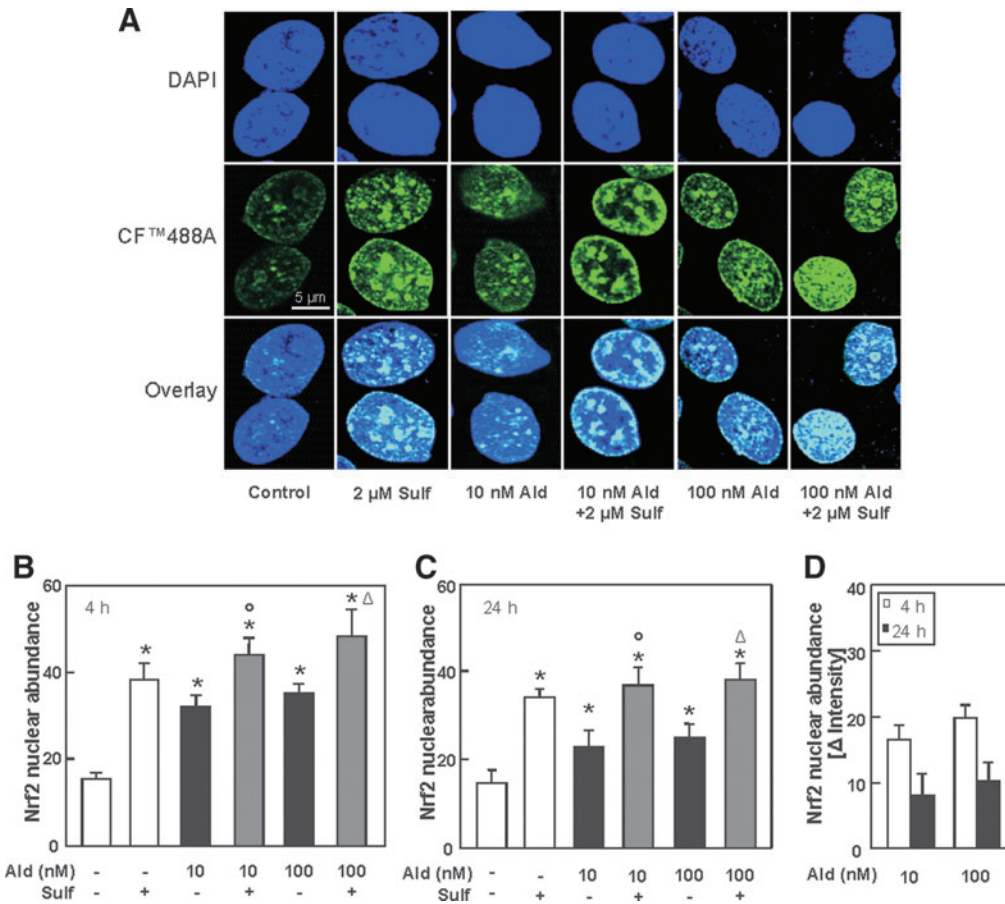

**SUPPLEMENTARY FIG. S3. Sulforaphane increases the cellular Nrf2 response.** (A) LLC-PK1 cells were stained for Nrf2-positive nuclei (green) and nuclear dye DAPI (blue). The *bottom row* represents the overlay of Nrf2-positive nuclei (FITC, green) and nuclear dye DAPI (blue). Shown are representative pictures of control cells and aldosterone- (10 and 100 nM) and sulforaphane (2  $\mu$ M)-treated cells. Pictures were taken by a TCS SP5 laser scanning confocal microscope. Quantifications were done by measuring gray values of  $\sim$ 100 cells per treatment after 4 h (B) and 24 h (C) with ImageJ. (D) Nrf2 nuclear abundance normalized to the respective control after 4 and 24 h of aldosterone treatment. (B–D) Shown are mean values  $\pm$  SEM, \* $p \leq 0.05$  versus the control group, ° $p \leq 0.05$  versus 10 nM aldosterone alone, Δ $p \leq 0.05$  versus 100 nM aldosterone alone, tested by ANOVA with subsequent *post-hoc* comparisons by Scheffé.
