# Supplementary material
Source: PubMed Central journal article supplement (PMC4215337)
Supplement: Supp_Fig5.pdf [file Supp_Fig5.pdf]

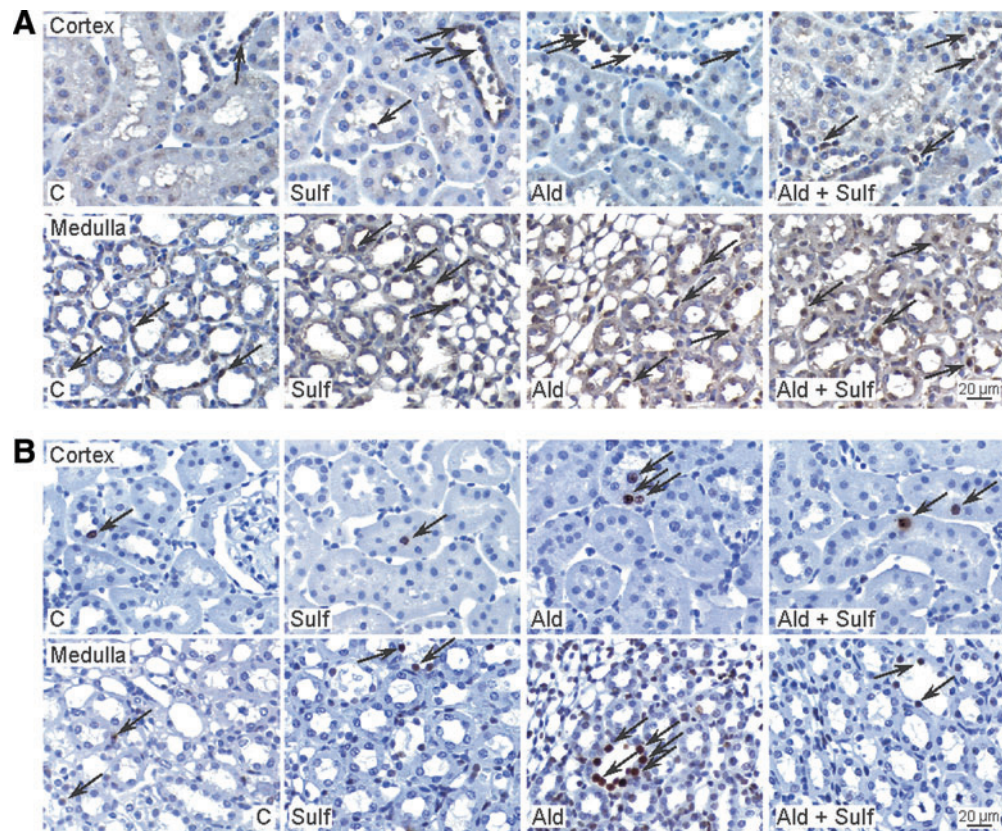

**SUPPLEMENTARY FIG. S5. Immunohistochemical staining on paraffin-embedded kidney cortex and medulla sections for Nrf2 activation and  $\gamma$ -H2AX abundance.** (A) Representative images of kidney cortex sections and kidney medulla sections for Nrf2 activation from animals of the control, sulforaphane, aldosterone, and sulforaphane/aldosterone groups. *Arrows* show examples for Nrf2-positive nuclei. (B) Representative images of kidney cortex sections and kidney medulla sections for  $\gamma$ -H2AX abundance from animals of the control, sulforaphane, aldosterone, and sulforaphane/aldosterone groups. *Arrows* show examples for  $\gamma$ -H2AX-positive nuclei.
